# Supplementary material for: Randomized phase II trial of lymphodepletion plus adoptive cell transfer of tumor-infiltrating lymphocytes, with or without dendritic cell vaccination, in patients with metastatic melanoma
Source: PubMed Central journal article supplement (PMC8144048; doi:10.1136/jitc-2021-002449), 2021-05-21
Supplement: jitc-2021-002449supp001.pdf [file jitc-2021-002449supp001.pdf]

### Supplementary Figure 1

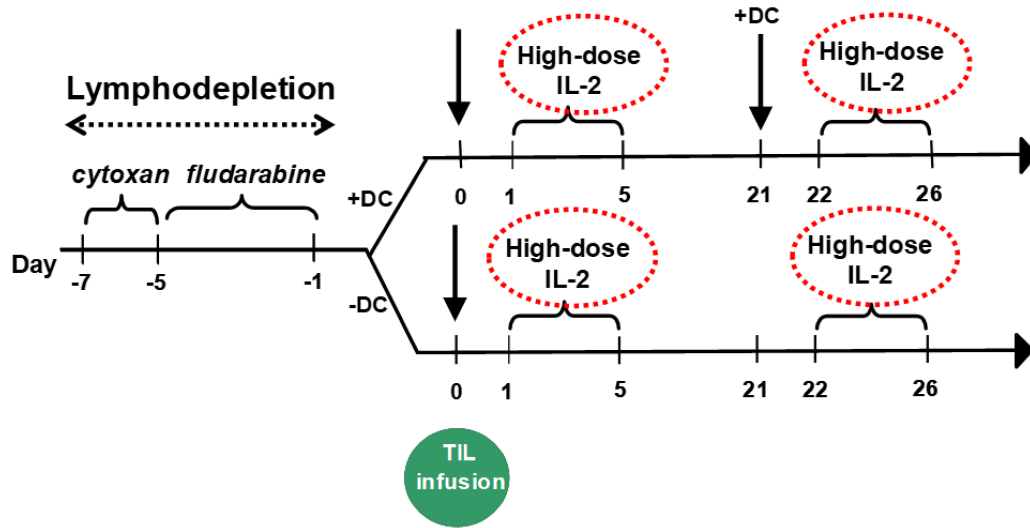

## Supplementary table 1: All randomized patients Characteristics

| Characteristic                 | Enrolled<br>(n=23) | TILs (n=12)     | TIL+DC (n=11)     | P<br>value   |
|--------------------------------|--------------------|-----------------|-------------------|--------------|
| Median age (range), years      | 48 (18-71)         | 49 (32-71)      | 41 (18-64)        | 0.15         |
| Sex                            |                    |                 |                   |              |
| Female                         | 10                 | 4               | 5                 | 1.00         |
| Male                           | 13                 | 6               | 3                 |              |
| White race                     | 23                 | 10              | 8                 | -            |
| Melanoma type                  |                    |                 |                   |              |
| Cutaneous                      | 17                 | 9               | 8                 | 1.00         |
| Acral                          | 2                  | 1               | 1                 |              |
| Undetermined                   | 3                  | 2               | 1                 |              |
| Mucosal                        | 1                  | 0               | 1                 |              |
| Stage                          |                    |                 |                   |              |
| 4 M1B                          | 2                  | 0               | 2                 | 0.2          |
| 4 M1C                          | 21                 | 12              | 9                 |              |
| ECOG*                          |                    |                 |                   |              |
| 0                              | 10                 | 2               | 8                 | <b>0.005</b> |
| 1                              | 9                  | 8               | 1                 |              |
| LDH#                           |                    |                 |                   |              |
| Normal                         | 15                 | 8               | 7                 | 1.0          |
| High                           | 4                  | 2               | 2                 |              |
| BRAF mutation                  |                    |                 |                   |              |
| BRAF V600 E                    | 12                 | 7               | 5                 |              |
| BRAF non-V600 E                | 2                  | 2               | 0                 | 0.3          |
| WT                             | 4                  | 1               | 3                 |              |
| Unknown                        | 5                  | 2               | 3                 |              |
| NRAS mutation                  |                    |                 |                   |              |
| Q61K                           | 3                  | 1               | 2                 | 0.5          |
| WT                             | 11                 | 7               | 4                 |              |
| Unknown                        | 9                  | 4               | 5                 |              |
| KIT mutation                   |                    |                 |                   |              |
| c-KIT                          | 2                  | 2               | 0                 | 0.5          |
| WT                             | 12                 | 7               | 5                 |              |
| Unknown                        | 9                  | 3               | 6                 |              |
| Number of infused TILs (range) | -                  | 38.2 (1.7-99) † | 69.4 (16.3-130) ‡ | <b>0.03</b>  |

Abbreviations: DC, dendritic cells; ECOG, Eastern Cooperative Oncology Group (0=asymptomatic, 1=symptomatic and ambulatory); WT, wild type; TIL, tumor-infiltrating lymphocytes.

\*In four patients, the ECOG was not evaluated

#In four patients, the LDH level was not measured

†Two patients did not receive any TIL therapy; one patient withdrew consent and another patient died before the initiation of treatment

‡ Two patients did not receive any TIL + DC therapy due to rapidly progressive disease. One patient received only one cycle of TIL + DC but was found to be ineligible for analysis as a result of concurrent BRAF inhibitor treatment.

**Supplementary Figure 2.**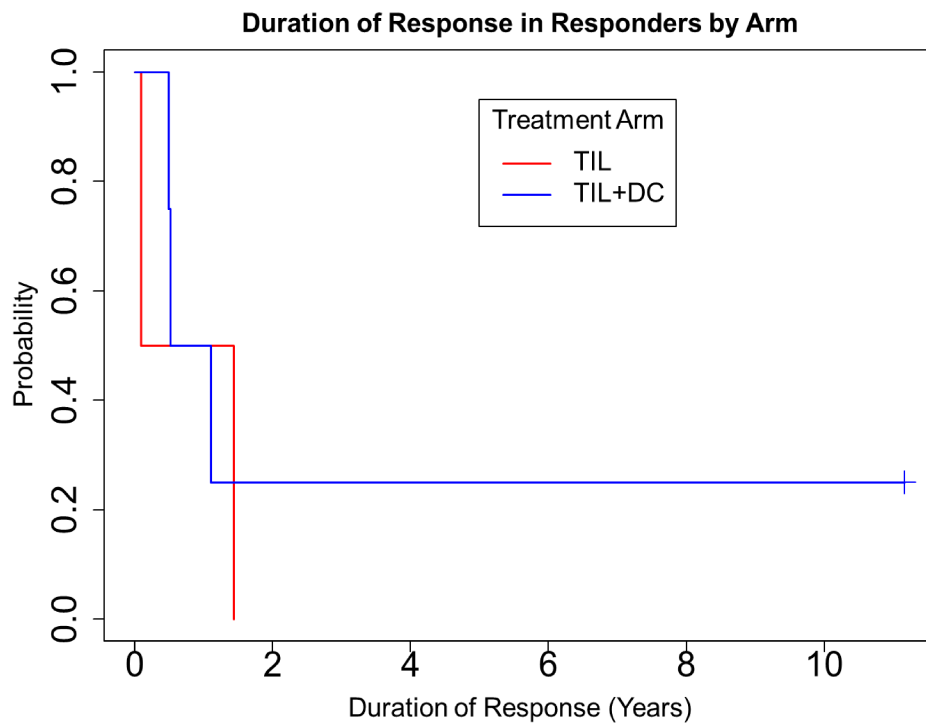

**Supplementary Figure 3.**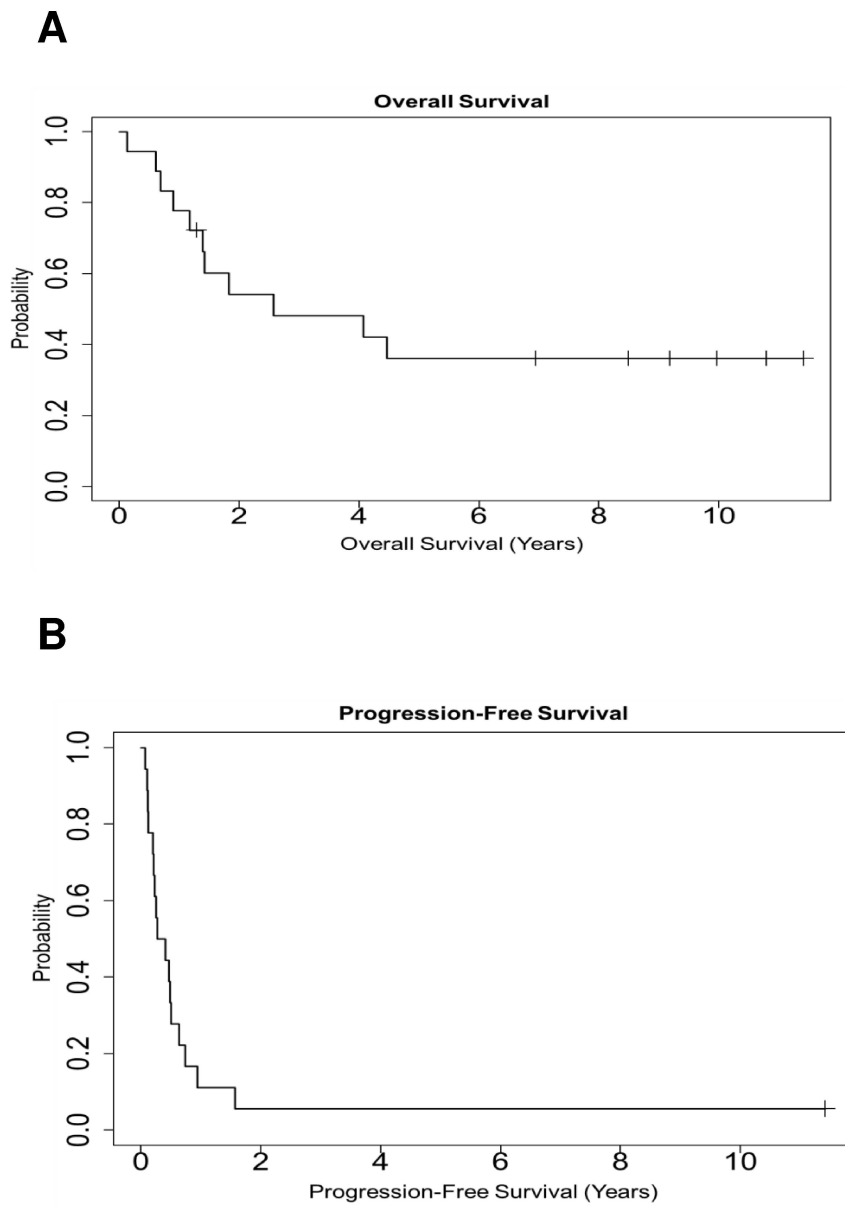

**Supplementary Table 1. Adverse events related to treatment**

| Toxicities                    | Maximum grade, number |   |   |   |
|-------------------------------|-----------------------|---|---|---|
|                               | 1                     | 2 | 3 | 4 |
| <b>Hematologic</b>            |                       |   |   |   |
| Neutropenia                   |                       | 4 | 6 |   |
| Thrombocytopenia              |                       | 4 | 6 |   |
| Leukopenia                    |                       | 9 | 1 |   |
| Lymphopenia                   | 1                     | 3 |   |   |
| Anemia                        | 3                     | 3 | 4 |   |
| <b>Gastrointestinal</b>       |                       |   |   |   |
| Nausea/vomiting               | 4                     | 1 | 1 |   |
| Diarrhea                      | 2                     |   |   |   |
| Constipation                  | 1                     | 1 |   |   |
| Anorexia                      | 2                     | 1 | 1 |   |
| LFT increase                  | 6                     |   |   |   |
| Bilirubin                     | 2                     | 1 |   |   |
| Blood in stool and melena     | 2                     |   |   |   |
| <b>Renal</b>                  |                       |   |   |   |
| Electrolyte imbalance         | 6                     | 3 | 1 |   |
| AKI creatinine                | 5                     |   | 1 |   |
| Urine output decreased        | 1                     | 2 |   |   |
| Proteinuria                   | 1                     |   |   |   |
| <b>Neurologic</b>             |                       |   |   |   |
| Fatigue                       | 4                     | 3 |   |   |
| Mental status changes         | 1                     |   |   |   |
| Headache                      | 1                     |   |   |   |
| Change in vision              | 1                     |   |   |   |
| <b>Dermatologic</b>           |                       |   |   |   |
| Alopecia                      | 1                     | 1 |   |   |
| Dry eyes                      | 1                     |   |   |   |
| Phlebitis                     |                       | 1 |   |   |
| Rash                          | 3                     | 2 |   |   |
| Pruritis                      | 3                     | 1 |   |   |
| Vitiligo                      |                       | 1 |   |   |
| <b>Vascular leak syndrome</b> |                       |   |   |   |
| Edema, weight gain            | 8                     | 3 |   |   |
| Dyspnea                       | 4                     | 2 |   |   |
| Capillary leak syndrome       | 1                     | 1 | 1 |   |
| Pleural effusion              | 2                     |   |   |   |
| Hypotension                   | 1                     | 1 |   |   |
| Fever/chills                  | 3                     | 2 |   |   |

AKI, acute kidney injury; LFT, liver function tests
